# Supplementary material for: Inactive bowel movement and stroke are associated with increased risks of mild cognitive impairment among community-living Singapore elderly
Source: publisher site journal article supplement (doi:10.18632/aging.103674), 2020-09-09
Supplement: Supplementary file [file aging-v12i17-103674-supplementary-material-SD1.pdf]

## SUPPLEMENTARY TABLES

Supplementary Table 1. The associations of dietary habits and medical comorbidities with bowel movement.

| Variables                                       | Have a bowel movement<br>within 10 minutes<br>( $\leq 3$ per week)<br>N=141<br>N (%) | Have a bowel movement<br>within 10 minutes<br>( $\geq 4$ per week)<br>N=610<br>N (%) | $\chi^2$     | P-value      |
|-------------------------------------------------|--------------------------------------------------------------------------------------|--------------------------------------------------------------------------------------|--------------|--------------|
| <b>How often consume meat and meat product</b>  |                                                                                      |                                                                                      | 0.063        | 0.802        |
| $\leq 3$ times per week                         | 77 (54.6)                                                                            | 326 (53.4)                                                                           |              |              |
| $\geq 4$ times per week                         | 64 (45.4)                                                                            | 284 (46.6)                                                                           |              |              |
| <b>How often consume milk and dairy product</b> |                                                                                      |                                                                                      | 0.324        | 0.569        |
| $\leq 3$ times per week                         | 73 (51.8)                                                                            | 332 (54.4)                                                                           |              |              |
| $\geq 4$ times per week                         | 68 (48.2)                                                                            | 278 (45.6)                                                                           |              |              |
| <b>How often consume green vegetables</b>       |                                                                                      |                                                                                      | 1.305        | 0.253        |
| $\leq 3$ times per week                         | 19 (13.5)                                                                            | 62 (10.2)                                                                            |              |              |
| $\geq 4$ times per week                         | 122 (86.5)                                                                           | 548 (89.8)                                                                           |              |              |
| <b>How often consume fruits</b>                 |                                                                                      |                                                                                      | 4.537        | <b>0.033</b> |
| $\leq 3$ times per week                         | 40 (28.4)                                                                            | 123 (20.2)                                                                           |              |              |
| $\geq 4$ times per week                         | 101 (71.6)                                                                           | 390 (79.8)                                                                           |              |              |
| <b>How often consume legumes</b>                |                                                                                      |                                                                                      | 0.344        | 0.558        |
| $\leq 3$ times per week                         | 124 (87.9)                                                                           | 525 (86.1)                                                                           |              |              |
| $\geq 4$ times per week                         | 17 (12.1)                                                                            | 85 (13.9)                                                                            |              |              |
| <b>How often consume eggs</b>                   |                                                                                      |                                                                                      | 0.033        | 0.856        |
| $\leq 3$ per week                               | 117 (83.0)                                                                           | 510 (83.6)                                                                           |              |              |
| $\geq 4$ per week                               | 24 (17.0)                                                                            | 100 (16.4)                                                                           |              |              |
| <b>How often consume coffee</b>                 |                                                                                      |                                                                                      | 0.719        | 0.397        |
| $\leq 3$ times per week                         | 39 (27.6)                                                                            | 191 (31.3)                                                                           |              |              |
| $\geq 4$ times per week                         | 102 (72.4)                                                                           | 419 (68.7)                                                                           |              |              |
| <b>How often consume nuts</b>                   |                                                                                      |                                                                                      | 0.647        | 0.421        |
| $\leq 3$ times per week                         | 130 (92.2)                                                                           | 548 (90.0)                                                                           |              |              |
| $\geq 4$ times per week                         | 11 (7.8)                                                                             | 61 (10.0)                                                                            |              |              |
| <b>How often consume sea fish</b>               |                                                                                      |                                                                                      | 0.006        | 0.936        |
| $\leq 3$ times per week                         | 73 (51.8)                                                                            | 312 (51.4)                                                                           |              |              |
| $\geq 4$ times per week                         | 68 (48.2)                                                                            | 295 (48.6)                                                                           |              |              |
| <b>How often consume tofu</b>                   |                                                                                      |                                                                                      | 0.182        | 0.670        |
| $\leq 3$ times per week                         | 123 (87.2)                                                                           | 522 (85.8)                                                                           |              |              |
| $\geq 4$ times per week                         | 18 (12.8)                                                                            | 86 (14.2)                                                                            |              |              |
| <b>How often consume carrot</b>                 |                                                                                      |                                                                                      | < 0.001      | 1.000        |
| $\leq 3$ times per week                         | 105 (75.0)                                                                           | 456 (75.0)                                                                           |              |              |
| $\geq 7$ times per week                         | 35 (25.0)                                                                            | 152 (25.0)                                                                           |              |              |
| <b>How often consume celery</b>                 |                                                                                      |                                                                                      | 0.129        | 0.719        |
| $\leq 3$ times per week                         | 132 (93.6)                                                                           | 573 (94.4)                                                                           |              |              |
| $\geq 4$ times per week                         | 9 (6.4)                                                                              | 34 (5.6)                                                                             |              |              |
| <b>How often consume walnut</b>                 |                                                                                      |                                                                                      | 0.206        | 0.650        |
| $\leq 3$ times per week                         | 133 (94.3)                                                                           | 569 (93.3)                                                                           |              |              |
| $\geq 4$ times per week                         | 8 (5.7)                                                                              | 41 (6.7)                                                                             |              |              |
| <b>How often consume curry</b>                  |                                                                                      |                                                                                      | 2.528        | 0.112        |
| $\leq 3$ times per week                         | 134 (95.0)                                                                           | 595 (97.5)                                                                           |              |              |
| $\geq 4$ times per week                         | 7 (5.0)                                                                              | 15 (2.5)                                                                             |              |              |
| <b>Hypertension</b>                             |                                                                                      |                                                                                      | <b>5.113</b> | <b>0.024</b> |
| Yes                                             | 81 (57.4)                                                                            | 286 (46.9)                                                                           |              |              |

|                                  |            |            |       |       |
|----------------------------------|------------|------------|-------|-------|
| No                               | 60 (42.6)  | 324 (53.1) |       |       |
| <b>Hyperlipidemia</b>            |            |            | 2.974 | 0.396 |
| Yes                              | 83 (58.9)  | 314 (51.5) |       |       |
| No                               | 58 (41.1)  | 296 (48.5) |       |       |
| <b>Diabetes mellitus</b>         |            |            | 0.624 | 0.430 |
| Yes                              | 28 (19.9)  | 104 (17.0) |       |       |
| No                               | 113 (80.1) | 506 (83.0) |       |       |
| <b>Stroke</b>                    |            |            | 0.327 | 0.586 |
| Yes                              | 6 (4.3)    | 20 (3.3)   |       |       |
| No                               | 135 (95.7) | 590 (96.7) |       |       |
| <b>Cataracts/glaucoma</b>        |            |            | 0.391 | 0.532 |
| Yes                              | 46 (32.6)  | 216 (35.4) |       |       |
| No                               | 95 (67.4)  | 394 (64.6) |       |       |
| <b>Gastrointestinal problems</b> |            |            | 0.776 | 0.687 |
| Yes                              | 10 (7.1)   | 56 (9.2)   |       |       |
| No                               | 131 (92.9) | 554 (90.8) |       |       |
| <b>Anxiety disorder</b>          |            |            | 4.160 | 0.125 |
| Yes                              | 4 (2.8)    | 6 (1.0)    |       |       |
| No                               | 137 (97.2) | 604 (99.0) |       |       |
| <b>Heart attack</b>              |            |            | 0.569 | 0.451 |
| Yes                              | 7 (4.7)    | 22 (3.6)   |       |       |
| No                               | 134 (95.3) | 588 (96.4) |       |       |
| <b>Irregular heartbeat</b>       |            |            | 0.211 | 0.646 |
| Yes                              | 7 (4.7)    | 25 (4.1)   |       |       |
| No                               | 134 (95.3) | 585 (95.9) |       |       |
| <b>Heart failure</b>             |            |            | 0.529 | 0.467 |
| Yes                              | 3 (2.1)    | 8 (1.3)    |       |       |
| No                               | 138 (97.9) | 602 (98.7) |       |       |

**Supplementary Table 2. Inference probabilities of Bayesian network for years of schooling and fruit consumption (%).**

| Paternal nodes     |                   | MCI     |
|--------------------|-------------------|---------|
| Years of schooling | Fruit consumption | Yes (%) |
| ≤5                 | ≤3 per week       | 32.58   |
| ≤5                 | ≥4 per week       | 22.36   |
| 6-11               | ≤3 per week       | 20.81   |
| 6-11               | ≥4 per week       | 17.78   |
| ≥12                | ≤3 per week       | 18.79   |
| ≥12                | ≥4 per week       | 17.76   |

Abbreviations: MCI, mild cognitive impairment.
